# Supplementary material
Source: HighWire-hosted journal article supplement (https://tech.snmjournals.org/highwire/filestream/9649/field_highwire_adjunct_files/0/257204_Supplemental_Data.pdf)
Supplement: 257204_Supplemental_Data.pdf [file 257204_Supplemental_Data.pdf]

# Workplace Bullying in Nuclear Medicine Technology and Clinical Education Survey

Thank you for your participation! Have you ever been bullied while at work? Your answers will help to evaluate whether bullying occurs in the nuclear medicine department and/or during nuclear medicine technology clinical education. All responses are voluntary, anonymous, and no identifiable information is recorded or used. Voluntary consent is implied when the survey is submitted.

We define bullying as a situation where one or several individuals persistently over a period of time perceive themselves to be on the receiving end of negative actions from one or several persons, in a situation where the target of bullying has difficulty in defending him or herself against these actions. We will not refer to a one-time incident as bullying.

**This survey is intended for Nuclear Medicine Technologists and Nuclear Medicine Technology Students. If you are not an NMT or NMT-S, please disregard this survey and do not complete it. This survey will take approximately 5 minutes to complete and will provide valuable insight on this topic!**

**The following behaviors are often seen as examples of negative behavior in the workplace. Over the last six months, how often have you been subjected to the following negative acts at work?**

- 1) Someone withholding information which affects your performance  
 Daily  
 Weekly  
 Monthly  
 Now and then  
 Never

---

- 2) Repeated reminders of your errors or mistakes  
 Daily  
 Weekly  
 Monthly  
 Now and then  
 Never

---

- 3) Persistent criticism of your work and effort  
 Daily  
 Weekly  
 Monthly  
 Now and then  
 Never

---

- 4) Spreading gossip and rumors about you  
 Daily  
 Weekly  
 Monthly  
 Now and then  
 Never

- 
- 5) Having insulting or offensive remarks made about your person (i.e. habits and background), your attitudes, or your private life
- Daily
  - Weekly
  - Monthly
  - Now and then
  - Never
- 

- Being shouted at or being the target of spontaneous anger (or rage)
- Daily
  - Weekly
  - Monthly
  - Now and then
  - Never
- 

- Being ignored or excluded
- Daily
  - Weekly
  - Monthly
  - Now and then
  - Never
- 

- Facing a hostile reaction when you approach
- Daily
  - Weekly
  - Monthly
  - Now and then
  - Never
- 

- Practical jokes carried out by people you don't get along with
- Daily
  - Weekly
  - Monthly
  - Now and then
  - Never
- 

- 10) Using the bullying definition provided at the beginning of this survey, please state whether you have been bullied at work over the last six months
- Yes, but only rarely
  - Yes, now and then
  - Yes, several times per week
  - Yes, almost daily
  - No, have not been bullied
- 

- 11) Please check all of the appropriate box(es) below to state who you were bullied by:
- My immediate superior
  - Other superiors/managers in the organization
  - Colleagues
  - Subordinates
  - Customers/patients/students, etc.
  - Others
  - Have not been bullied
- 

- 12) Please state the gender(s) of your perpetrators  
\*Check all that apply
- Male
  - Female
  - Have not been bullied
-

13) Which of the following best describes your occupation  Nuclear Medicine Administrator  
 Nuclear Medicine Educator  
 Nuclear Medicine Technologist  
 Nuclear Medicine Technologist Student-in-Training  
 Other

---

14) Have you ever experienced bullying as a student  Yes  
 No

---

15) Have you ever witnessed bullying as a student  Yes  
 No

---

16) Have you ever experienced bullying as a technologist  Yes  
 No  
 I am a student/does not apply

---

17) Have you ever witnessed bullying as a technologist  Yes  
 No  
 I am a student/does not apply

---

18) If you experienced bullying in nuclear medicine, who initiated the bullying  
\*Check all that apply

- Administrator
- Radiologist
- Radiology Nurse
- Radiology Scheduler/Secretary
- Technologist
- Student
- Educator
- Did not experience bullying

---

19) If you witnessed bullying in nuclear medicine, who initiated the bullying  
\*Check all that apply

- Administrator
- Radiologist
- Radiology Nurse
- Radiology Scheduler/Secretary
- Technologist
- Student
- Educator
- Did not experience bullying

---

20) If you experienced bullying in nuclear medicine, what position were you in at the time  
\*Check all that apply

- Administrator
- Radiologist
- Radiology Nurse
- Radiology Scheduler/Secretary
- Technologist
- Student
- Educator
- Did not experience bullying

---

21) If you witnessed bullying in nuclear medicine, who was the target of the bullying  
\*Check all that apply

- Administrator
- Radiologist
- Radiology Nurse
- Radiology Scheduler/Secretary
- Technologist
- Student
- Educator
- Did not experience bullying

- 
- 22) To your knowledge, was the bullying ever reported  Yes  
 No  
 No bullying was experienced or witnessed  
 Do not know
- 
- 23) If you experienced bullying, were you fearful of retaliation if you had reported it or stood up to the bully  Yes  
 No  
 No bullying was experienced
- 
- 24) If you witnessed bullying, were you fearful of retaliation if you had reported it or stood up to the bully  Yes  
 No  
 No bullying was witnessed
- 
- 25) If the bullying was reported, did the bullying  Increase  
 Decrease  
 No change  
 No bullying was reported  
 Do not know if bullying was reported or changed
- 
- 26) Have you ever defended someone being bullied  Yes  
 No  
 No bullying was witnessed
- 
- 27) Have you ever initiated bullying toward someone else  Yes  
 No
- 
- 28) Do you feel the attention to patient care by you or others decreased as a result of experiencing or witnessing workplace bullying  Yes  
 No  
 No bullying was experienced or witnessed
- 
- 29) Are you aware of your facility or educational institution having anti-bullying policies  Yes, my facility has anti-bullying policies and they are enforced  
 Yes, my facility has anti-bullying policies but they are not enforced  
 No, my facility does not have anti-bullying policies  
 I do not know/am unaware if my facility has anti-bullying policies
- 
- 30) Do you support or oppose the enactment of a law that would protect all workers from workplace bullying  Strongly support  
 Somewhat support  
 Not sure  
 Somewhat oppose  
 Strongly oppose

**Demographic questions will assist the researcher in evaluating any associations between the variables. No identifiable information is recorded. Thank you for completing this important section of the survey!**

31) Gender  Male  
 Female  
 Other/Prefer not to answer

---

32) Age Range  <25  
 26-35  
 36-45  
 46-55  
 >56

---

33) Race  African American  
 Asian  
 Hispanic  
 White  
 Other/Prefer not to answer

---

34) Height  Petite  
 Average (Female 5'4; Male 5'9)  
 Tall

---

35) Body Type  Underweight  
 Healthy  
 Overweight  
 Obese

---

36) Highest Education Level  Certificate  
 Associates degree  
 Bachelor's degree  
 Master's degree  
 Doctoral degree

---

37) Experience in nuclear medicine technology  Less than one year  
 1 - 2 years  
 2 - 4 years  
 4 - 6 years  
 6 - 10 years  
 10 - 15 years  
 15 - 20 years  
 20 years or more  
 Not sure/do not know

---

Thank you for taking the time to complete this survey!
